# Supplementary material
Source: PubMed Central journal article supplement (PMC4649665)
Supplement: 10.1534_115.180364_genetics.115.180364-2.pdf [file 10.1534_115.180364_genetics.115.180364-2.pdf]

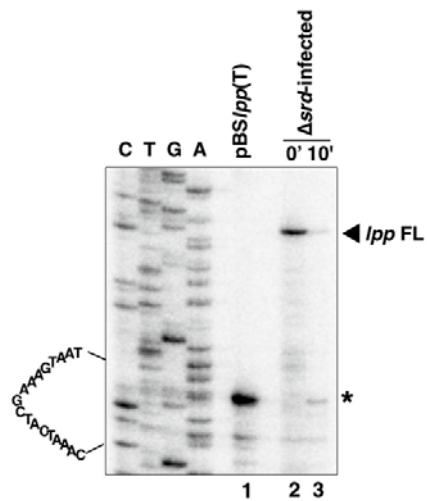

**Figure S3** The 5' end of truncated *lpp* RNA driven from a pBS/*lpp*(T) plasmid. Five micrograms of total RNAs extracted from TY1001 ( $\Delta lpp::kan$ ) cells harboring pBS/*lpp*(T) treated with 1 mM IPTG for 10 min (lane 1), from MH1(wild-type) cells at 0 min (lane 2) or at 10 min (lane 3) after infection with  $\Delta srd$  mutant were used for primer extension analysis. FL or an asterisk denotes the full-length *lpp* mRNA or its decay intermediate, respectively. The 5' end of truncated *lpp* RNA expressed from pBS/*lpp*(T) was identical to that of the decay intermediate of *lpp* mRNA accumulated in  $\Delta srd$  mutant-infected cells.
