# Supplementary material
Source: PubMed Central journal article supplement (PMC4649665)
Supplement: 10.1534_115.180364_genetics.115.180364-4.pdf [file 10.1534_115.180364_genetics.115.180364-4.pdf]

(A)

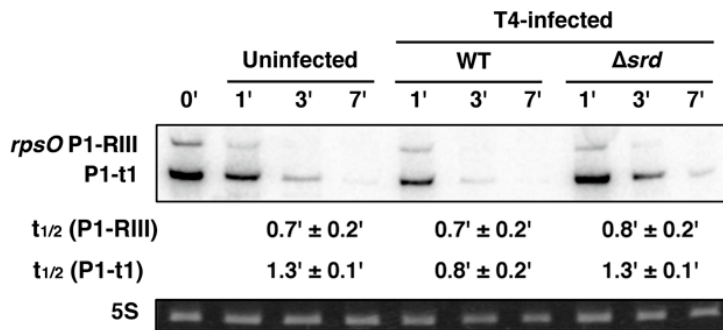

(B)

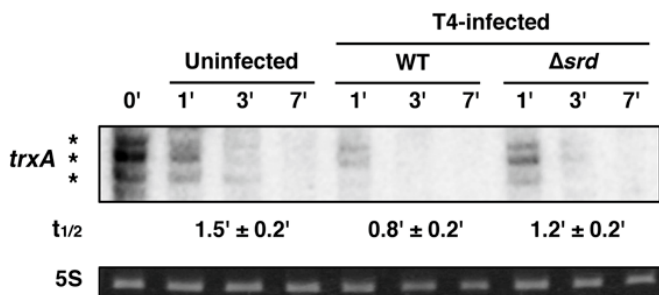

(C)

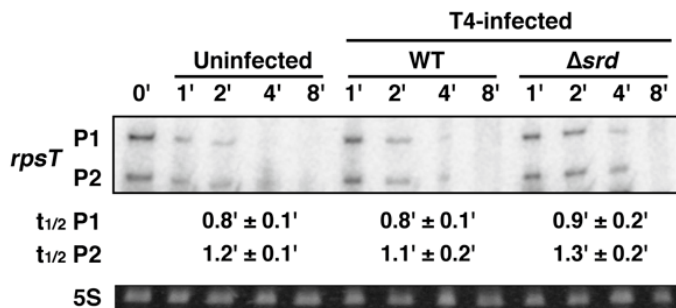

**Figure S2** Effect of Srd on stabilities of unstable mRNAs. MH1 (wild-type) cells were grown in M9C medium until the  $OD_{600}$  reached 0.5 at 37°, and infected with wild type T4 or  $\Delta$ *srd* mutant or treated with rifampicin at a final concentration of 250  $\mu$ g/ml. Total RNAs were extracted at the indicated times after infection or addition of rifampicin and then analyzed by northern blotting with an oligo-probe for *rpsO* (A, 5'-<sup>32</sup>P- TTGCTTCAGTACTTAGAGAC), *trxA* (B, 5'-<sup>32</sup>P- CTGTCGTCAGTCAGGTGAATAATTTTATCGCTC) or *rpsT* (C, 5'-<sup>32</sup>P- AGAGCGACGGCTTGCGTTGTGCTTACGAGCCTTTTCAGACTGAATGGCGC). The *rpsO*(P1-t1) mRNA corresponds to the monocistronic *rpsO* transcript while the *rpsO*(P1-RIII) mRNA generates from the processing of the *rpsO-pnp* bicistronic transcript by RNase III (Hajnsdorf *et al.* 1994). Asterisks in the figure (B) indicate multiple *trxA* transcripts. Ethidium bromide-stained 5S rRNA as a loading control is shown at the bottom of each panel. Half-lives ( $t_{1/2}$ ) with the mean  $\pm$  SD of duplicate measurements are shown below the figure. Like *lpp* and *ompA* mRNAs, *trxA* and *rpsO*(P1-t1) mRNAs were destabilized after infection with wild-type T4 and this destabilization was recovered by the deletion of *srd*.
