# Supplementary material
Source: PubMed Central journal article supplement (PMC4649665)
Supplement: 10.1534_115.180364_genetics.115.180364-5.pdf [file 10.1534_115.180364_genetics.115.180364-5.pdf]

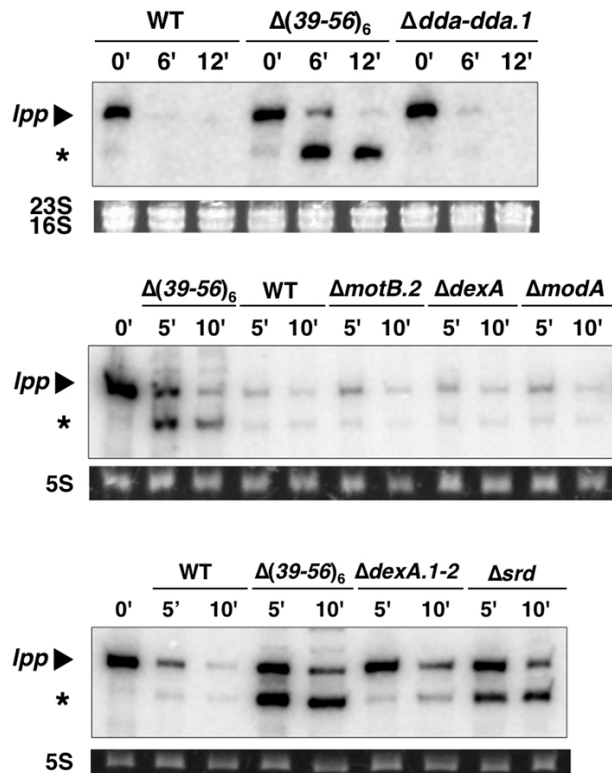

**Figure S1** Effect of deleted genes on T4-induced host mRNA degradation. MH1 (wild-type) cells were grown in M9C medium until the  $OD_{600}$  reached 0.5 at 37°, and infected with T4 wild type,  $\Delta(39-56)_6$ ,  $\Delta dda-dda.1$ ,  $\Delta motB.2$ ,  $\Delta dexA$ ,  $\Delta modA$ ,  $\Delta dexA.1-dexA.2$  or  $\Delta srd$  mutant phage. Total RNAs were extracted at the indicated times after infection and then analyzed by northern blotting with a probe for *lpp*. An arrowhead and an asterisk indicate full-length and a decay intermediate of *lpp* mRNA, respectively. Ethidium bromide-stained 5S rRNA or 23S/16S rRNA as a loading control is shown at the bottom of each panel. The  $\Delta srd$  mutant demonstrated that *lpp* mRNA was stabilized and that the decay intermediate was strongly accumulated, as with  $\Delta(39-56)_6$  mutant.
