# Supplementary material
Source: PubMed Central journal article supplement (PMC4649665)
Supplement: 10.1534_115.180364_genetics.115.180364-6.pdf [file 10.1534_115.180364_genetics.115.180364-6.pdf]

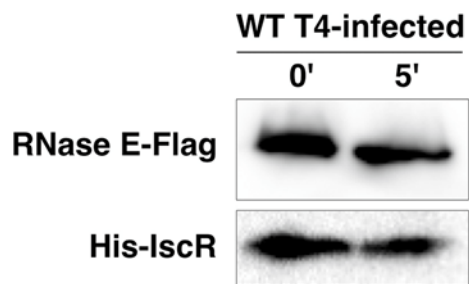

**Figure S5** Amount of RNase E before and after T4 infection. TY1007 (*rne-FLAG-cat*) cells harboring pQ-orf2-95 were grown in LB medium until the  $OD_{600}$  reached 0.3 and treated with 0.02 mM IPTG for 30 min to induce expression of IscR. Cells were harvested immediately before (0 min) or 5 min after T4 infection. Equal amount of cell extracts were electrophoresed through a 10% polyacrylamide gel containing SDS, followed by western blotting with antibodies against FLAG-tag and His-tag. The amount of RNase E did not change after T4 infection.
