# Supplementary material
Source: PubMed Central journal article supplement (PMC4649665)
Supplement: 10.1534_115.180364_genetics.115.180364-7.pdf [file 10.1534_115.180364_genetics.115.180364-7.pdf]

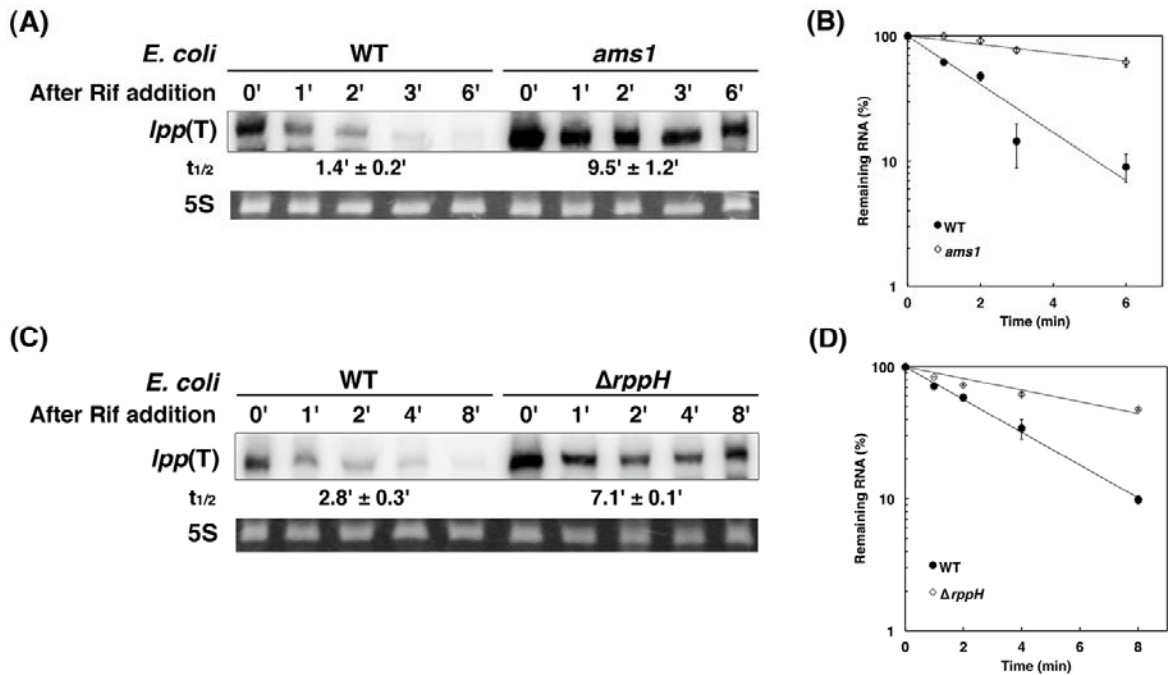

**Figure S4** Degradation of *lpp(T)* RNA under normal growth condition. (A) TY1001 ( $\Delta lpp::kan$ ) or TY1002 ( $\Delta lpp::kan ams1$ ) cells harboring pBS*lpp(T)* were grown in LB medium until the  $OD_{600}$  reached 0.3 at 30° and shifted to 44° for another 30 min. After cells were treated with 1 mM IPTG for 10 min to induce expression of *lpp(T)* RNA, total RNAs extracted at the indicated times after addition of rifampicin were subjected to northern blotting with a probe for *lpp*. The RNA with a sequence identical to the truncated intermediate of *lpp* mRNA is labeled as *lpp(T)* (upper panel). (B) Quantification analysis of *lpp(T)* RNA in the figure (A) was performed. Data points represent the mean  $\pm$  SD of triplicate measurements. A half-life ( $t_{1/2}$ ) of each mRNA is shown below the figure (A). (C) TY1001 or TY1006 ( $\Delta lpp::kan \Delta rppH$ ) harboring pBS*lpp(T)* were treated with 1 mM IPTG for 10 min when the  $OD_{600}$  reached 0.5 at 30°. Total RNAs extracted at the indicated times after addition of rifampicin were subjected to northern blotting with a probe for *lpp*. (D) Quantification analysis of *lpp(T)* RNA in the figure (C) was performed. Data points represent the mean  $\pm$  SD of triplicate measurements. *lpp(T)* RNA was degraded by RNase E in RppH-dependent manner under normal growth condition.
