# Supplementary material
Source: PubMed Central journal article supplement (PMC4649665)
Supplement: 10.1534_115.180364_genetics.115.180364-8.pdf [file 10.1534_115.180364_genetics.115.180364-8.pdf]

**Table S1 Primers used for construction of deletion mutant phages in this study.**

| Phage mutant          | Primer 1 (5'-3')                 | Primer 2 (5'-3')                                         | Primer 3 (5'-3')               |
|-----------------------|----------------------------------|----------------------------------------------------------|--------------------------------|
| <i>ΔmodA</i>          | GACTCCCAAGCTTGCGCC<br>TTCTGCTATG | GGATGCATCGGTGCGTGCTTCTATTCGGA<br>AGTAATGATACCAGCTGGAAGTG | ATCTTGACAGATGTTGAACA<br>GT     |
| <i>Δsrd</i>           | ACGCGTCGACTCATCGTA<br>AATTC      | CGTTTAGAGCATACTCAGGCATCTGCCTGA<br>AAAGAGGATATCCGCTAAATTG | ACGCGTCGACATTGAGGT<br>AGTTG    |
| <i>Δdda-dda.1</i>     | ACGCGTCGACTTATCGTT<br>TTGTTG     | GCGATAGTTTACCGAGACAAAGACGGTGT<br>CACCCGTGGTTCGTTATGATGTG | ACGCGTCGACGTAAGATG<br>TGAGAA   |
| <i>ΔdexA.1-dexA.2</i> | ACGCGTCGACTTATCGTT<br>TTGTTG     | GGAAGCTATTCGTGGAAATAACTAAAGAG<br>GTCAAATTCGTGATTTAGCGAGG | ACGCGTCGACCAATTGCA<br>GGGAAT   |
| <i>ΔdexA</i>          | ACGCGTCGACTTAGTTTA<br>AGGTA      | GGGAAGTGGTGAAAAAGCAGCGGTTGGG<br>TCTTGAAGATGCTCCATCAGAGG  | ACGCGTCGACAAATTTGA<br>GGAAG    |
| <i>ΔmotB.2</i>        | TCAACGCCATCTTCCAAT<br>CCAT       | GACGCTATAACAATACGCCGAGATCTTGG<br>CGGGCATCAAGTAATGTTCCG   | GTACCGGAATCCGATGA<br>ATTAGTTTC |
